# Supplementary material for: Cetyltrimethylammonium chloride-loaded mesoporous silica nanoparticles as a mitochondrion-targeting agent for tumor therapy
Source: Royal Society of Chemistry journal article supplement (doi:10.1039/d0ra02023k), 2020-01-01
Supplement: d0ra02023k1.pdf [file d0ra02023k1.pdf]

Electronic supplementary information

# **Cetyltrimethylammonium Chloride-Loaded Mesoporous Silica Nanoparticles as Mitochondrion- Targeting Agent for Tumor Therapy**

Menghuan Tang <sup>a</sup>, Peng Zhang <sup>b</sup>, Jiahui Liu <sup>a</sup>, Yijuan Long <sup>a</sup>, Yuan Cheng <sup>b\*</sup>, Huzhi

Zheng <sup>a\*</sup>

<sup>a</sup> Key Laboratory of Luminescent and Real-Time Analytical Chemistry (Southwest University), Ministry of Education, College of Chemistry and Chemical Engineering, Southwest University, Chongqing, 400715, China.

<sup>b</sup> Department of Neurosurgery, the Second Affiliated Hospital of Chongqing Medical University, Chongqing, 400010, China

\*Corresponding authors E-mail:

chengyuan023@aliyun.com (Y. Cheng).

zhenghz@swu.edu.cn (H. Zheng)

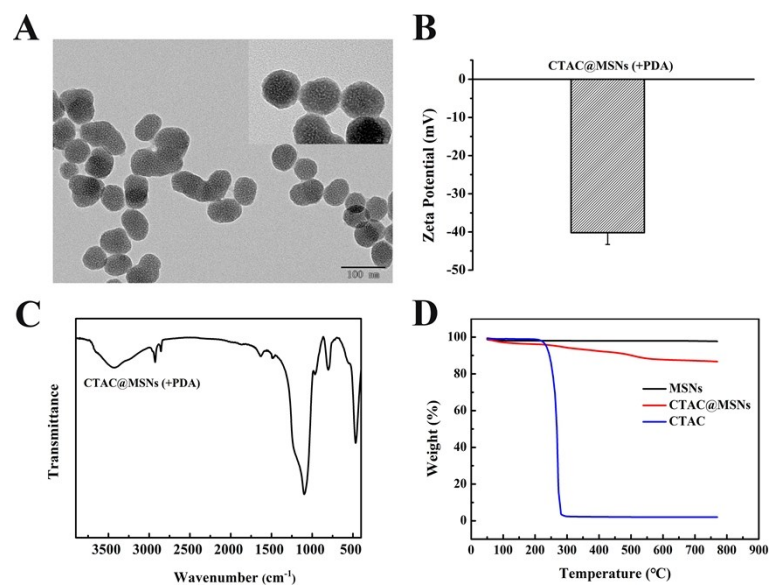

**Figure S1.** (A) TEM images, (B) Zeta potential, (C) FTIR spectra of MSNs@CTAC (+ PDA) NPs (D)TGA of CTAC, MSNs and CTAC@MSNs NPs

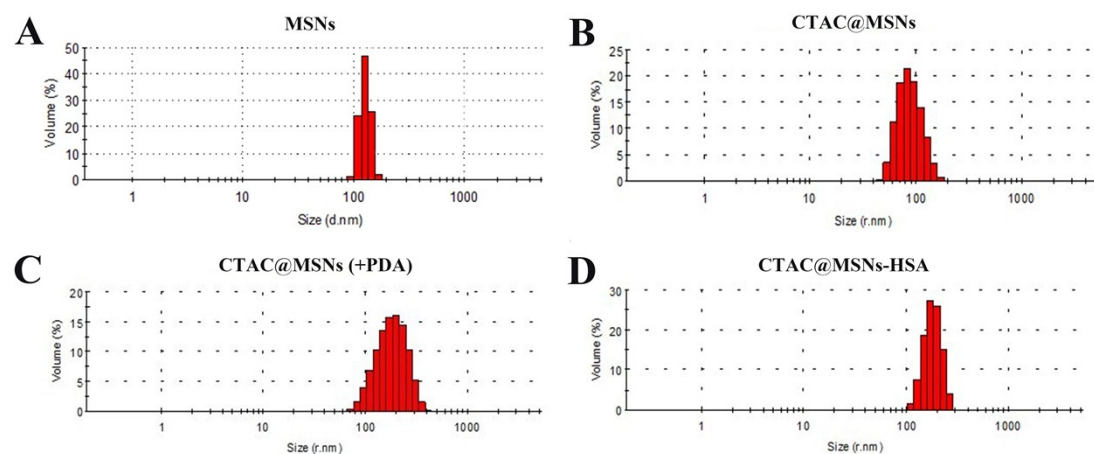

**Figure S2.** DLS measurements of (A) MSNs, (B) CTAC@MSNs, (C) CTAC@MSNs (+PDA) and (D) CTAC@MSNs-HSA NPs

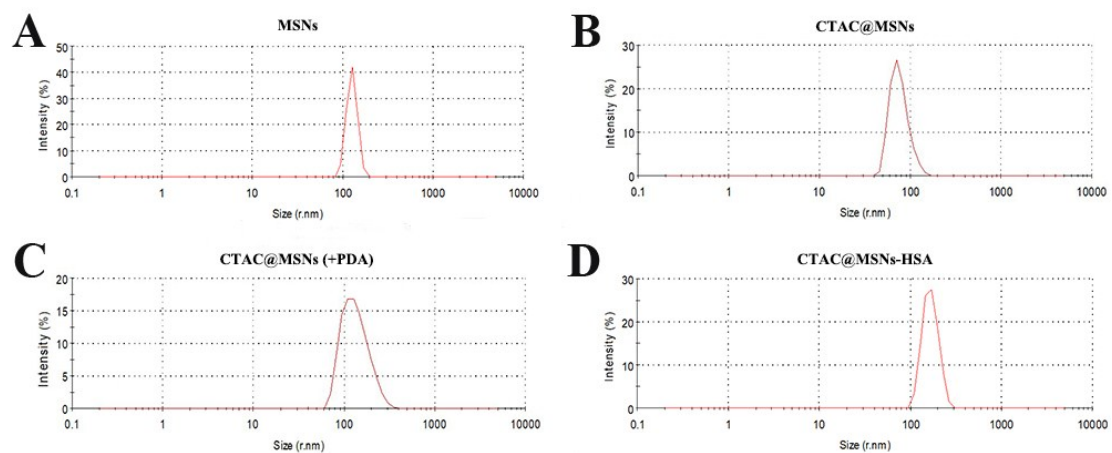

**Figure S3.** DLS measurements of (A) MSNs, (B) CTAC@MSNs, (C) CTAC@MSNs (+PDA) and (D) CTAC@MSNs-HSA NPs

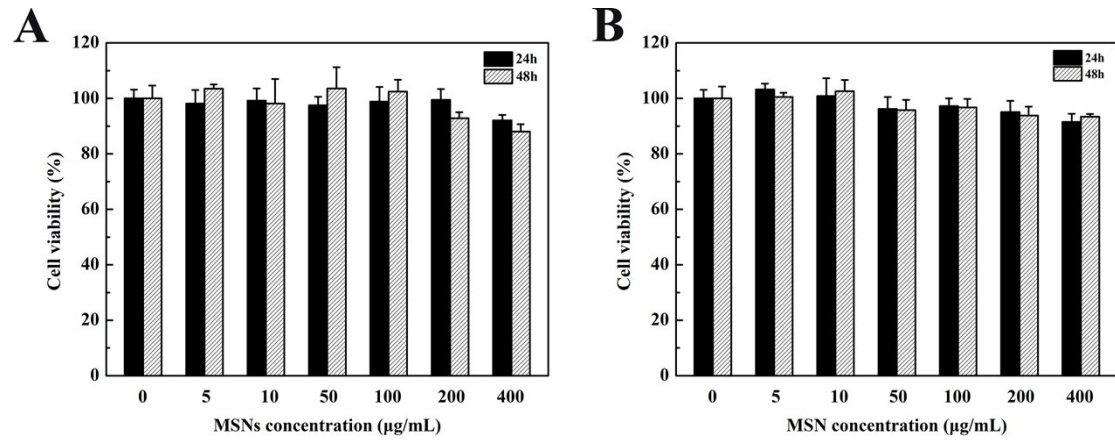

**Figure S4.** Cell viabilities of the (A) MCF-7 cells and (B) MCF-7/ADR treated with different concentration of MSNs for 24 h and 48 h. Data are represented as mean  $\pm$  SD (n = 3).

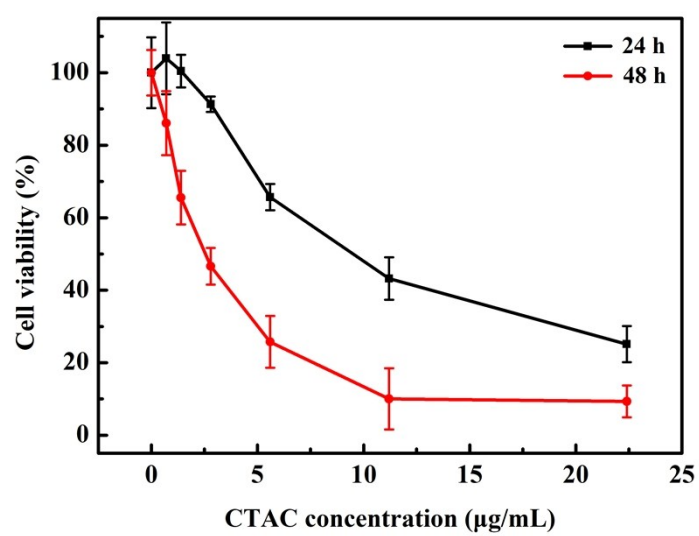

**Figure S5.** Cytotoxicity of CTAC@MSNs (+ PDA) against MCF-7 after incubating for 24 h and 48 h. Data are represented as mean  $\pm$  SD (n = 3).

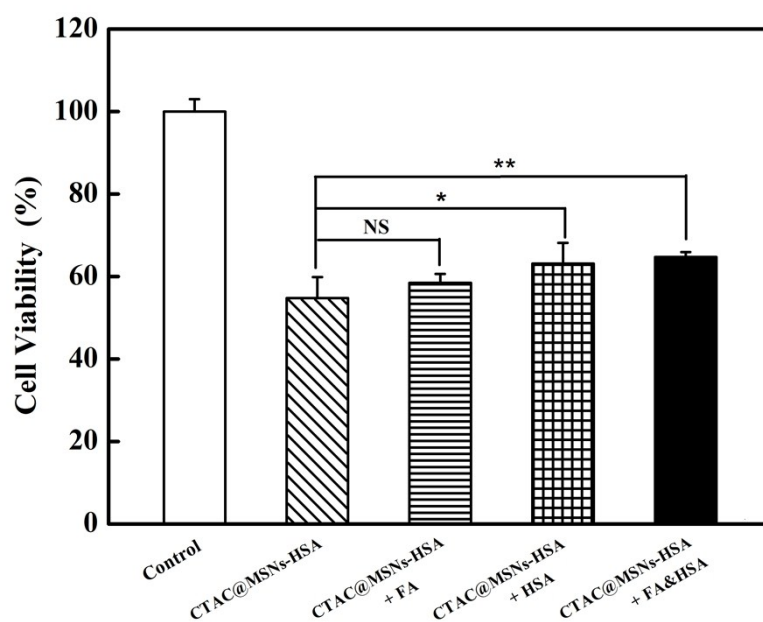

**Figure S6.** Cytotoxicity of CTAC@MSNs-HSA against MCF-7 cells with free FA (5  $\mu\text{g/mL}$ ) and free HSA (5  $\mu\text{g/mL}$ ) in 24 h. NS: not significant, \* $p < 0.05$ , \*\*  $p < 0.01$ , \*\*\* $p < 0.001$ , when compared with CTAC@MSNs-HSA group. Data are represented as mean  $\pm$  SD ( $n = 3$ )

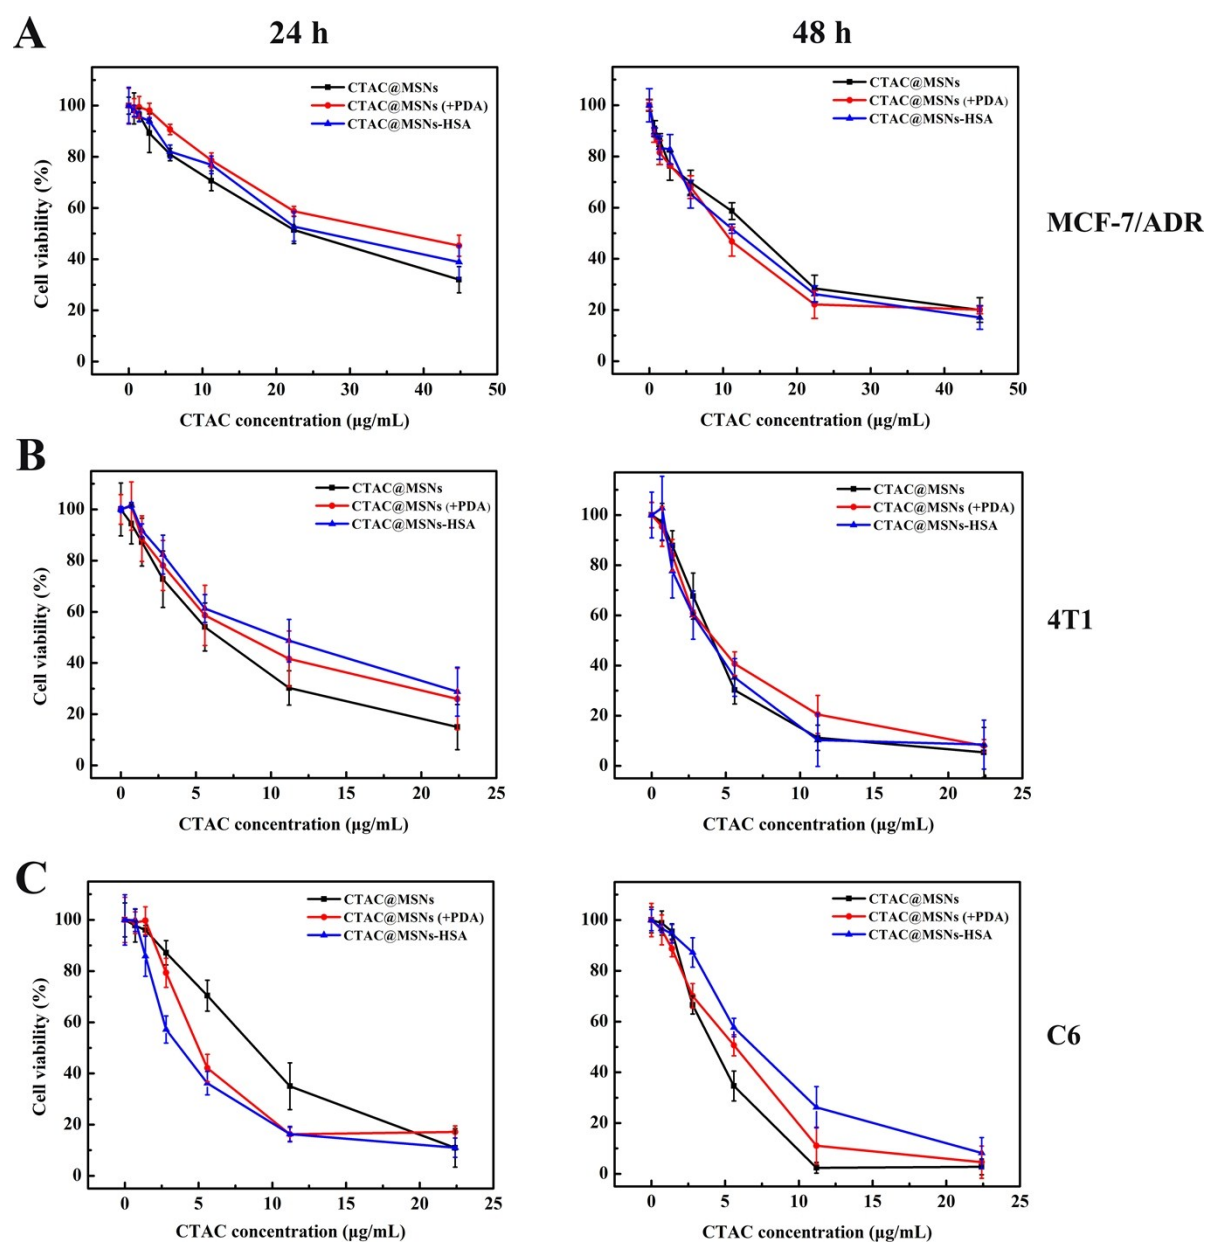

**Figure S7.** Cytotoxicity of NPs against (A) MCF-7/ADR, (B) 4T1 and (C) C6 after incubating for 24 h and 48 h. Data are represented as mean  $\pm$  SD (n = 3)



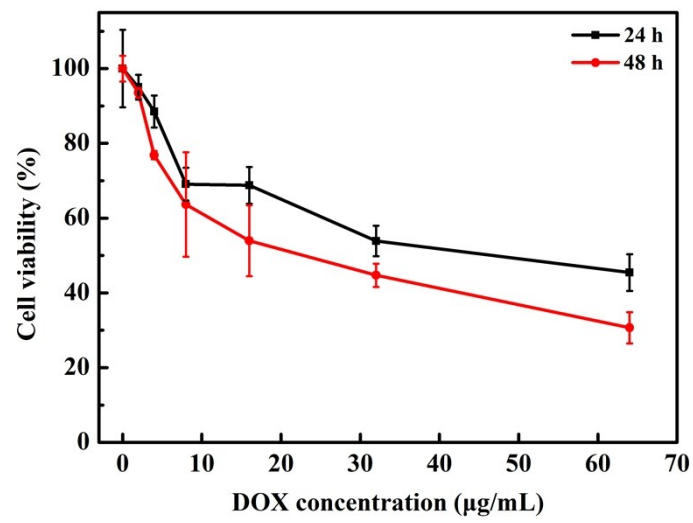

**Figure S8.** Cytotoxicity of DOX against MCF-7/ADR after incubating for 24 h and 48 h. Data are represented as mean  $\pm$  SD (n = 3)

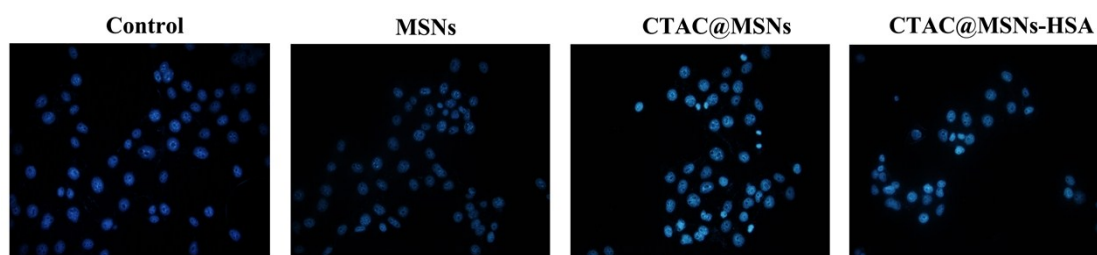

**Figure S9.** Fluorescence images of Hoechst staining in MCF-7 cells after treated with MSNs, CTAC@MSNs and CTAC@MSNs-HSA solution (2  $\mu\text{g/mL}$  of CTAC) for 48 h.

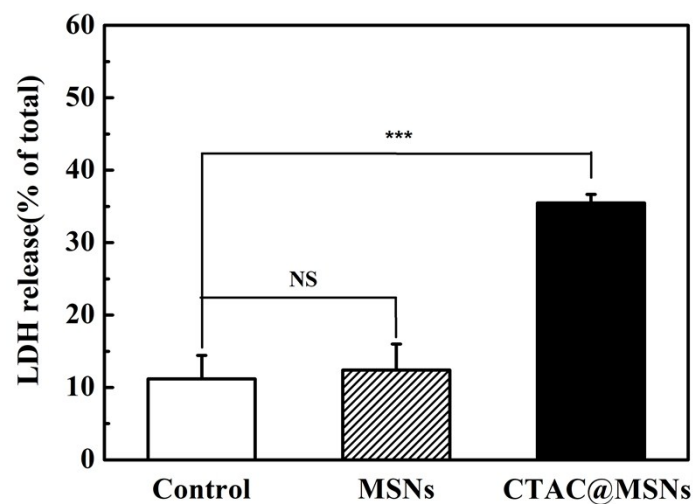

**Figure S10.** LDH assay of MCF-7 cells after incubating with MSNs and CTAC@MSNs NPs (2  $\mu\text{g/mL}$  of CTAC) for 24 h. NS: not significant, \* $p < 0.05$ , \*\*  $p < 0.01$ , \*\*\* $p < 0.001$ , when compared with the untreated cells (control). Data are represented as mean  $\pm$  SD ( $n = 3$ )

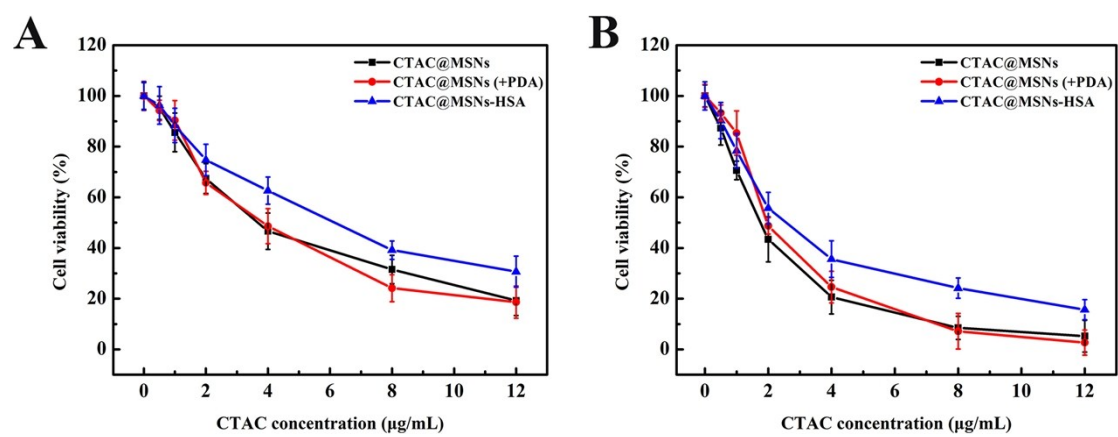

**Figure S11.** Cytotoxicity of NPs against MCF-10A after incubating for (A) 24 h and (B) 48 h. Data are represented as mean  $\pm$  SD ( $n = 3$ )

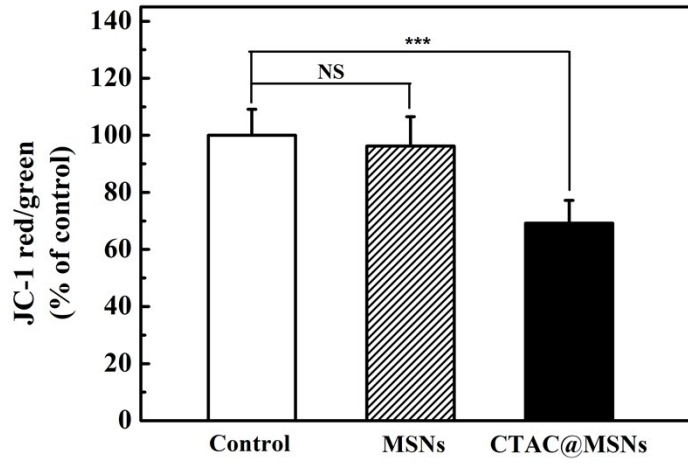

**Figure S12.** The effects of MSNs, CTAC@MSNs on the determination of  $\Delta\Psi_m$  loss through a spectral shift of JC-1-stained cells treated with NPs for 24 h. \* $p < 0.05$ , \*\*  $p < 0.01$ , \*\*\* $p < 0.001$ , when compared with the untreated cells (control). Data are represented as mean  $\pm$  SD ( $n = 3$ )

**Table S1.** The size obtained from TEM and DLS and the PDI of NPs.

|                         | Diameter (nm)  | DLS size (nm)    | PDI  | $\zeta$ potential (mV) |
|-------------------------|----------------|------------------|------|------------------------|
| <b>MSNs</b>             | 48.5 $\pm$ 6.4 | 121.5 $\pm$ 4.2  | 0.19 | -23.7 $\pm$ 2.49       |
| <b>CTAC@MSNs</b>        | 51.4 $\pm$ 4.9 | 111.4 $\pm$ 9.4  | 0.34 | 0.745 $\pm$ 0.12       |
| <b>CTAC@MSNs (+PDA)</b> | 52.3 $\pm$ 5.0 | 206.1 $\pm$ 17.4 | 0.41 | -40.2 $\pm$ 3.10       |
| <b>CTAC@MSNs-HSA</b>    | 59.2 $\pm$ 5.2 | 251.4 $\pm$ 17.7 | 0.45 | -39.5 $\pm$ 1.66       |

**Table S2.** IC<sub>50</sub> values ( $\mu$ g/mL) of different nanoparticles against different cells after 24 h treatment.

|                         | MCF-7 | MCF-7/ADR | 4T1  | C6   |
|-------------------------|-------|-----------|------|------|
| <b>CTAC@MSNs</b>        | 6.06  | 17.70     | 6.08 | 8.76 |
| <b>CTAC@MSNs (+PDA)</b> | 11.06 | 34.59     | 8.33 | 5.20 |
| <b>CTAC@MSNs-HSA</b>    | 9.74  | 28.04     | 9.97 | 3.86 |
| <b>DOX</b>              |       | 43.8      |      |      |

**Table S3.** IC<sub>50</sub> values ( $\mu$ g/mL) of different nanoparticles against different cells after 48 h treatment.

|                         | MCF-7 | MCF-7/ADR | 4T1  | C6   |
|-------------------------|-------|-----------|------|------|
| <b>CTAC@MSNs</b>        | 3.51  | 7.43      | 3.88 | 4.34 |
| <b>CTAC@MSNs (+PDA)</b> | 3.47  | 9.15      | 4.18 | 6.66 |
| <b>CTAC@MSNs-HSA</b>    | 2.85  | 10.38     | 3.63 | 4.83 |
| <b>DOX</b>              |       | 21.3      |      |      |
